1

2

## Higher-order dissimilarity in biodiversity:

3

### Identifying dissimilarities of spatial or temporal dissimilarity structures

4

5 Running title: Higher-order dissimilarity

6

7 Ryosuke Nakadai<sup>1</sup>, Keita Fukasawa<sup>1</sup>, Taku Kadoya<sup>1,2</sup>, Fumiko Ishihama<sup>1</sup>

8

9 \* Correspondence: Ryosuke Nakadai

10

11 <sup>1</sup> Biodiversity division, National Institute for Environmental Studies, Onogawa 16-2, Tsukuba,

12 Ibaraki, 305-8506, Japan

13 <sup>2</sup> Graduate School of Comprehensive Human Sciences, University of Tsukuba, Tsukuba,

14 Ibaraki, 305-8571, Japan

15

16 ORCID

17 Ryosuke Nakadai 0000-0002-9512-8511

18 Keita Fukasawa 0000-0002-9563-457X

19 Taku Kadoya 0000-0002-7816-5484

20 Fumiko Ishihama 0000-0001-8515-5914

21

### 22 Acknowledgements

23 We thank Dr. Satoshi Aoki for his advice on the choice of coalescent simulator.

24

### 25 Author contributions

26 RN, FI, KF, and TK designed the study; RN conceived the idea of higher-order dissimilarity,

27 analysed the datasets, and wrote the first draft of the manuscript, with significant inputs from

28 KF, FI, and TK; KF and RN developed the methodology to quantitatively evaluate the idea

- 29 introduced in the present study; and FI conceived the basic concept of the methodology. All
- 30 authors have contributed substantially to the final version of this manuscript.

31 **Abstract**

32 Elucidating biodiversity patterns and their background processes is critical in biodiversity  
33 science. Dissimilarity, which is calculated based on multivariate biological quantities, is a  
34 major component of biodiversity. As the availability of spatial and temporal biodiversity  
35 information increases, the scope of dissimilarity studies has been expanded to cover various  
36 levels and types of spatio-temporal biodiversity facets (e.g. gene, community, and ecosystem  
37 function), and diverse pairwise dissimilarity indices have been developed. However, further  
38 development of the dissimilarity concept is required in comparative studies on spatio-  
39 temporal structures of biodiversity compositional patterns, such as those exploring  
40 commonalities of biogeographical boundaries among taxa, compared to the conventional  
41 ones to consider higher dimensions of dissimilarity: dissimilarity of dissimilarity structures.  
42 This study proposes a novel and general concept, high-order dissimilarity (HOD), for  
43 quantitatively evaluating the dissimilarities of spatial or temporal dissimilarity structures  
44 among different datasets, proposes specific implementation of HOD as operational indices,  
45 and illustrates potential resolution of scientific and practical questions by means of HOD.  
46 Our conceptual framework on HOD extends the existing framework of biodiversity science,  
47 and is versatile, with many potential applications in the acquisition of more valuable  
48 information from ever-increasing biodiversity data.

49

50 **Keywords:**

51 autocorrelation, beta diversity, dissimilarity matrix, genetic differentiation, multivariate  
52 analysis

53

## 54 **Introduction**

55 Nature's patterns are ubiquitous regardless of the level of biological organisation, and the  
56 elucidation of their determinants has been a long-standing and fundamental issue in  
57 biodiversity science. Dissimilarity is a key element of such patterns, and has been studied in  
58 terms of spatial and temporal differences and changes in various biological entities, mostly at  
59 the same level of biological organisation (Anderson et al. 2011). This encompasses  
60 differences and changes in genetic alleles, species composition, interaction networks, and  
61 ecosystem functions (Whittaker 1960, 1972; Raymond and Rousset 1995; Miki et al. 2018;  
62 Mori et al. 2015; Poisot et al. 2012). The scope of dissimilarity is continuously expanding,  
63 covering various levels and types of biodiversity facets, which has stimulated the  
64 development of conceptual and analytical frameworks for the analysis of the determinants of  
65 dissimilarity patterns using various dissimilarity indices (Koleff et al. 2003; Lozupone and  
66 Knight 2005; Baselga 2010; Rocchini et al. 2018; Mammola and Cardoso 2020). Notably,  
67 despite the varieties, all these indices have a common form in that one dissimilarity value is  
68 calculated from two vectors of multivariate biological quantities (i.e. pairwise dissimilarity  
69 indices), and the calculation of dissimilarity values for all pairs of vectors yields a  
70 dissimilarity matrix (Anderson et al. 2011).

71         Some of the spatio-temporal structures of biodiversity composition patterns,  
72 however, are beyond the scope of pairwise dissimilarity and identifying, quantifying, and  
73 understanding them necessitates higher-order considerations. In a spatial context, higher-  
74 order considerations are useful for the analysis of categorically different dissimilarity  
75 matrices, such as among assemblages of different taxonomic groups and among species (i.e.  
76 comparative biogeography and phylogeography). For example, biogeographical researchers  
77 have attempted to identify common biogeographical borders among taxa (Wallace 1894; Holt  
78 et al. 2013; Whittaker et al. 2013; Komaki 2021); similarities or dissimilarities in spatial  
79 composition dissimilarities among multiple taxa need to be evaluated. In the temporal context,  
80 higher-order consideration would provide a framework for quantitatively evaluating  
81 dissimilarity in compositional changes (i.e. temporal asynchrony of compositional changes),  
82 such as among sites and different trophic groups. For example, temporal changes in

83 community composition (i.e. temporal beta diversity: Legendre 2019; Nakadai 2022) have  
84 recently been expanded to multiple sites at large spatial scales (Magurran et al. 2019;  
85 Nakadai 2020; Gotelli et al. 2022), thus necessitating quantitative evaluation of inter-site  
86 dissimilarity between temporal dynamics of community composition measured using  
87 pairwise comparison. Furthermore, loss and biotic homogenisation in species composition  
88 and intraspecific haplotypes have been studied in-depth since the identification of human-  
89 induced impacts on biodiversity within the context of conservation (Olden 2006; Valtonen et  
90 al. 2017). Moreover, quantifying the temporal change of spatial dissimilarity structure from a  
91 baseline at a time point is essential to assessing the impacts. Despite the apparent importance  
92 and scientific need for higher-order consideration in dissimilarities, general concepts and  
93 formal statistical methods for quantitative comparisons across conventional pairwise  
94 dissimilarities have not been fully developed.

95 To address this limitation, we introduce a general framework for considering  
96 dissimilarities at a higher order (hereafter referred to as higher-order dissimilarity; HOD)  
97 than that of conventional pairwise dissimilarities. HOD is a natural extension of the pairwise  
98 dissimilarity indices and considers differences between dissimilarity matrices. In addition, it  
99 can be a novel building block in the studies of the dissimilarities of spatio-temporal structures  
100 of biodiversity compositional patterns. First, in the present study, we formally define the  
101 novel and general concept, HOD, to quantitatively evaluate dissimilarities of spatial or  
102 temporal dissimilarity structures among different datasets (Fig. 1a). Second, we designed the  
103 concept of HOD and proposed its implementation as a general statistical method. Third, we  
104 demonstrated the advantages of the HOD concept by applying it to actual patterns, such as  
105 long-term and/or large-spatial hypothetical monitoring datasets. Finally, we discuss the  
106 potential impacts of the concept of “higher-order dissimilarity” and the developed analytical  
107 framework on a wide range of research fields, including understanding complex spatio-  
108 temporal structures in biodiversity and future methodological challenges.

109

110 ***Higher-order dissimilarity***

111 In biodiversity science, one dissimilarity value is generally calculated from two vectors of  
112 multivariate biological quantities (e.g. community composition or allele frequency).  
113 Specifically, a community dissimilarity index (e.g. Bray-Curtis dissimilarity; Odum 1950)  
114 and a genetic distance index (e.g.  $F_{st}$ ; Wright 1969) were calculated based on vectors of  
115 species abundance in two target communities and vectors of genetic allele frequency in two  
116 target populations, respectively. In addition, multiple vectors are summarised into a matrix  
117 called a site-species (or time-species) matrix (e.g. compositional vectors for sites or time  
118 points). The calculation of dissimilarity values for all pairs of vectors yields a dissimilarity  
119 matrix, which is a conventional pairwise dissimilarity; we call this first-order dissimilarity  
120 (Fig. 1a). Here, we extend the first-order dissimilarity to formally define HOD as  
121 dissimilarities of spatial or temporal dissimilarity structures (Fig. 1a). We also define ‘order’  
122 as nested times for calculating dissimilarity, e.g. conventional pairwise dissimilarity is the  
123 first order; and dissimilarity of dissimilarity matrices the second order. By definition, the  
124 concept can be extended to a higher order where appropriate, such as to the third order (i.e.  
125 dissimilarity of second-order dissimilarity matrices).

126 The concept of HOD is a generalisation of the traditional analytical approach to  
127 identifying boundaries and their commonalities in the context of biogeography. In addition,  
128 HOD targets the spatial structure, which has been the primary subject of biogeography, and  
129 temporal structure. Specifically, to spatially and temporally distinguish HODs, we use the  
130 terms ‘spatial HOD’ and ‘temporal HOD’ (Fig. 1b). Given the recent rapid growth of spatio-  
131 temporal monitoring data, HODs regarding temporal variation in spatial structure (i.e.  
132 temporal change in spatial HOD, Fig. 1b) or spatial variation in temporal structure (i.e.  
133 spatial change in temporal HOD, Fig. 1b) will be applicable in future analyses. To elucidate  
134 the concept, the subsequent sections mainly focus on second-order dissimilarities, which are  
135 similar to spatial and temporal HODs.

136

### 137 ***Implementation of the higher-order dissimilarity***

138 When sampling points comprising two biodiversity datasets are obtained at the same spatial  
139 or temporal location and correspond precisely one-to-one, their dissimilarity matrix elements

140 also correspond one-to-one. However, this is not always true. For example, when comparing  
141 two phylogeographic patterns, the sample points of each species are usually in different  
142 locations. In such a case, the elements of dissimilarity matrices do not correspond one-to-one,  
143 and temporal or spatial proximity information is required for comparison. To accommodate  
144 the biodiversity dataset with different sampling designs, we classified the calculation  
145 methods of HOD with and without spatial or temporal proximity information as types 1 and 2  
146 of the HOD indices, respectively. Type 1 HOD indices were only adopted for exhaustive  
147 datasets; therefore, pairs of datasets were collected at identical sampling points. Unlike type 1  
148 indices, type 2 HOD was applicable to an ‘irregular dataset’ (i.e. a dataset where the two  
149 compositional vectors to be compared were observed at different points spatially and  
150 temporally, and did not correspond on a one-to-one basis). The most basic calculation of the  
151 HOD index is determining the average value of the differences between the dissimilarity  
152 matrices of the same pairs of sites or time points (mean absolute differences; Fig. 2), which is  
153 a type 1 index. Technically, the HOD index can be calculated as the commonly used Mantel  
154 correlation coefficient (Mantel correlation coefficient  $r$ ; Fig. 2) calculated from two spatial or  
155 temporal dissimilarity matrices as a type 1 index. While these two indices are technically  
156 conventional methods, they are often impractical for calculating the dissimilarity of  
157 dissimilarity structures owing to the complexity of the comprehensive collection of data from  
158 all sampling points, as we assume for conceptualisation of the present study. Particularly, in  
159 our comparison of the temporal HOD using a long-term monitoring dataset, we could not use  
160 the two conventional indices if some places of the monitoring sites changed during the period  
161 because perfectly matched datasets were assumed in the calculation of their dissimilarity. In  
162 the case of spatial HOD, genetic samples of two species for comparison are often taken at  
163 different sites, and we cannot apply the two indices in this case. This can be addressed using  
164 spatial or temporal information.

165 Type 2 HOD indices are newly introduced analytical concepts in the present study, and are  
166 calculated using two distance matrices of dissimilarity with spatial or temporal information.  
167 Here, we introduce two HOD indices of type 2 based on bivariate Moran’s  $I$  and Geary’s  $C$

168 indices (Eckardt and Mateu 2021). Our concept of HOD is general and is thus capable of any  
 169 metrics of first-order dissimilarity other than those employed here.

170 In the following section, we introduce a new calculation method that enables the  
 171 quantification of HOD by applying the indices of spatial cross-correlation developed in  
 172 previous studies to the distance space rather than the actual space. First, we define the spatial  
 173 and temporal distance between two pairs of sampling points that correspond to elements of  
 174 two dissimilarity matrices to expand the indices of spatial statistics to calculate the HOD.  
 175 Considering a dissimilarity value from each of two dissimilarity matrices,  $X_{ij}$  and  $X'_{kl}$ , and  
 176 then the relevant two pairs of sampling points are at hand which we denote  $(\mathbf{s}_i, \mathbf{s}_j)$  and  $(\mathbf{s}'_k, \mathbf{s}'_l)$ .  
 177 Between  $(\mathbf{s}_i, \mathbf{s}_j)$  and  $(\mathbf{s}'_k, \mathbf{s}'_l)$ , there are two exhaustive sets of point-wise distances:  $(d_{ik} = |\mathbf{s}_i -$   
 178  $\mathbf{s}'_k|, d_{jl} = |\mathbf{s}_j - \mathbf{s}'_l|)$  and  $(d_{il} = |\mathbf{s}_i - \mathbf{s}'_l|, d_{jk} = |\mathbf{s}_j - \mathbf{s}'_k|)$  (Fig. 2). From these sets of distances, the  
 179 distance between the pairs of sampling points is expressed as follows:

$$180 \quad \Delta_{ij,kl} = \min((d_{ik}^2 + d_{jl}^2)^{1/2}, (d_{il}^2 + d_{jk}^2)^{1/2}).$$

181

182 For the special case where  $\mathbf{s}_i = \mathbf{s}'_k$  and  $\mathbf{s}_j = \mathbf{s}'_l$ , this distance metric is equal to 0. Another  
 183 special case is  $\mathbf{s}_i = \mathbf{s}_j$  and  $\mathbf{s}'_k = \mathbf{s}'_l$ , where the distance becomes  $\sqrt{2} \times$  (Euclidean distance  
 184 between  $\mathbf{s}_i$  and  $\mathbf{s}'_k$ ). With this generalisation of distance for pairs of sampling points, we can  
 185 calculate the weight matrix for dissimilarity values and apply the conventional measures of  
 186 spatial cross-correlation to type 2 HOD. To simplify the calculation of the HOD, we  
 187 converted dissimilarity matrices into vectors  $\mathbf{x} = \text{vec}(\mathbf{X})$  and  $\mathbf{x}' = \text{vec}(\mathbf{X}')$ , and denoted their  
 188 sizes as  $n$  and  $n'$ , respectively. Correspondingly, the distance between the pair of sampling  
 189 points  $\Delta$  was reshaped to a matrix with  $n$  rows and  $n'$  columns.

190 Bivariate Moran's  $I$  (Wartenberg 1985; Lee 2001; Eckardt and Mateu 2021) is a popular  
 191 measure of spatial cross-correlation. The specification for dissimilarity values is expressed as  
 192 follows:

$$193 \quad I = \frac{nn'}{\sum_i \sum_j w(\Delta_{ij})} \times \frac{\sum_i \sum_j w(\Delta_{ij})(x_i - \mu_x)(x'_j - \mu_{x'})}{\sqrt{\sum_i (x_i - \mu_x)^2 \sum_j (x'_j - \mu_{x'})^2}}, \quad (1)$$

194 where  $w(\Delta_{ij})$  is an arbitrary spatial weight which is a function of  $\Delta_{ij}$  and  $x_i$  and  $x'_j$  are the  $i^{\text{th}}$   
 195 and  $j^{\text{th}}$  elements of  $\mathbf{x}$  and  $\mathbf{x}'$ , respectively.  $\mu_x$  and  $\mu_{x'}$  are the mean values of  $\mathbf{x}$  and  $\mathbf{x}'$ ,



196 respectively. Generally,  $w(\Delta_{ij})$  is a decreasing or step function of  $\Delta_{ij}$ . If the dissimilarity  
197 values of the point pairs that are close in space (or time) show similar deviations from their  
198 means, the positive values are calculated, which indicates that the two sets of data compared  
199 have spatially and temporally similar dissimilarity structures, or *vice versa*.

200 Another option for a spatial cross-correlation measure alternative to Moran's  $I$  is bivariate  
201 Geary's  $C$  (Eckardt and Mateu 2021):

202

$$203 \quad C = \frac{(nn' - 1)}{2 \sum_i \sum_j w(\Delta_{ij})} \times \frac{\sum_i \sum_j w(\Delta_{ij}) (x_i - x'_j)^2}{\sqrt{\sum_i (x_i - \mu_x)^2 \sum_j (x'_j - \mu'_x)^2}}. \quad (2)$$

204

205 The definition of the parameters is the same as that in Eq. (1). The bivariate Geary's  $C$   
206 tends to be large when the squared deviations between two dissimilarities are large, where  $w_{ij}$   
207 is large, and correlates negatively with Moran's  $I$ .

208 To test the relationships among the HOD indices, we applied these four indices to both a  
209 simple sample case and 100 simulated datasets, including 37 hexagon-grided communities  
210 (Fig. S1) using the R package, 'mobsim' (May et al. 2018; see Supplementary text 1 for  
211 details on simulation). The distance between adjacent hexagons was set to 1, and we applied  
212 a step function where the weights were equal to 1 for pairs of sampling points where the  
213 points in the pair were identical; or one was identical and the other adjacent (i.e.  $\Delta_{ij} = 0$  or 1);  
214 the distance between adjacent hexagons was set to 0 for all other site pairs. For all pairs of the  
215 four HOD indices, we tested the relationships using Mantel tests, and found that all four  
216 indices were highly correlated with each other (Fig. S2); specifically, all absolute values of  
217 the Mantel correlation were above 0.9.

218 To check the properties of the HOD indices, we summarised the specific values of spatial  
219 HOD for pairs of simple sample cases (Table 1). The spatial weight function for type 2 HODs  
220 was identical to that in the simulation above. Within each type of HOD index, the indices are  
221 correlated. Specifically, the correlations between mean absolute differences and mantle  $r$ , and  
222 between bivariate Moran's  $I$  and bivariate Geary's  $C$  are positive and negative, respectively.  
223 Conversely, the relationships between type 1 and type 2 HOD indices are inconsistent with

224 respect to the robustness of the spatial autocorrelation. Specifically, for pairs that contain at  
225 least one dataset with low spatial autocorrelation, the calculated values of HOD differ  
226 considerably between types 1 and 2. HOD type 2 is affected by spatial (or temporal)  
227 autocorrelation because it is weighted in spatial or temporal distances, unlike HOD type 1,  
228 which is based solely on simple dissimilarity values.

229 All the samples presented in the present study used unscaled values (i.e. absolute values)  
230 of dissimilarity to allow for comparisons among similar datasets. When applying the HOD  
231 approach to two different types of datasets, it would be appropriate to standardise values  
232 within each dissimilarity matrix to compare dissimilarity structures. For example, when  
233 calculating the HOD of the genetic structure between different species, a standardisation  
234 process is necessary because the absolute value of the genetic distance between differentiated  
235 and non-differentiated species is different.

236

### 237 ***Resolvable questions through the higher-order dissimilarity approaches***

238 Theoretically, HOD concepts are applicable to any type of dissimilarity dataset if the relative  
239 position (i.e. sites or time points) can be determined based on the absolute distance between  
240 pairs of datasets. For example, the monitoring of the genetic structure is one of the most  
241 urgent targets of biodiversity monitoring (Hoban et al. 2021; O'Brien et al. 2022) although no  
242 effective monitoring framework has been developed. In this context, the HOD provides an  
243 ideal framework for the quantitative evaluation of genetic structure temporally (Fig. 3). As  
244 frequently probable examples, we show two hypothetical scenarios of genetic structure  
245 changes: one is a stable scenario (orange line and dots) and the other is a genetically  
246 homogenised scenario (blue line and dots) in Fig. 3 (see Supplementary Text 2 for detailed  
247 information about construction for visualisation). Fig. 3(a) indicates temporal changes in the  
248 values of the HOD type 1 index (i.e. mean absolute differences) to time 0 (starting point), and  
249 the lower Fig. 2(b) represents mapped overviews of changes in genetic structure over time,  
250 from which we calculated the HOD values. The scarcity of such spatially coordinated data on  
251 genetic structures over a wide area will soon be addressed, particularly following the

252 development of environmental DNA technology (Tsuji et al. 2022), and our framework will  
253 be an essential contribution to genetic diversity monitoring.

254 To show the advantages of HOD more comprehensively, we summarised the potential  
255 applications of HOD in Table 2, including five types of datasets: community composition,  
256 genetic frequency, ecosystem function, interaction network, and phylogeny. Most of the cases  
257 are straightforward extensions of those shown in Fig. 1b. One special case is that HOD  
258 approaches are applicable to phylogenetic patterns, despite the difficulty in extracting single-  
259 dimensional values; for example, the output of non-metric multidimensional scaling based on  
260 multiple traits. Evidently, HOD approaches can be applied to a wide variety of datasets in  
261 community ecology, biogeography, phylogeography, and macroevolution. This fact further  
262 emphasises the importance of developing a field of study for HOD.

263 The main focus has been on comparisons between dissimilarity matrices with similar  
264 properties, but this is not necessarily the case. Examples include comparisons among  
265 communities of different trophic levels and comparisons between community structures and  
266 genetic structures in community members. In traditional approaches, revealing the relative  
267 importance of the driving processes of local communities, such as abiotic vs. biotic factors  
268 and/or top-down vs. bottom-up processes as drivers of community structures, has been a  
269 major concern (Smith et al. 2010; HilleRisLambers et al. 2012). The HOD approach is a  
270 different perspective that directly evaluates the similarity of patterns without explicitly  
271 considering the driving processes. Low values of HOD among data from different trophic  
272 levels of communities and different hierarchies of genetic and community data allowed us to  
273 generate novel hypotheses with more direct evidence, as the processes shaping them are  
274 considered common among the compared targets (taxonomic differences; Fig. 1b).  
275 Conversely, high HOD values suggest that the process of constructing the overall system is  
276 complex and contingent. From an application perspective, high values of spatial HOD also  
277 suggest that achieving conservation through the establishment of protected areas, setting  
278 focal species for conservation, or implementing a single conservation policy would be  
279 difficult, as the driving processes differ among taxa and levels of biological entities.

280

## 281 *Future challenges*

282 Despite the significance of the concept of the HOD, there are several methodological  
283 challenges. In this paper, we discussed HOD, assuming an ideal situation where the target  
284 sites (or time points) have been exhaustively examined without any missing values. However,  
285 in empirical studies, it is often unsatisfactory, and this is one of the reasons underlying the  
286 failure to devise HOD in the past. To overcome this challenge, candidate approaches are  
287 broadly divided into two categories. One is the interpolation of missing data through  
288 modelling approaches, such as generalised dissimilarity modelling and species distribution  
289 modelling. Generalised dissimilarity modelling (GDM) is an approach that specialises in  
290 dissimilarities, differences, and distances (Ferrier et al. 2007). If target dissimilarities are  
291 modelled by other variables (e.g. environment and geography) using GDM, the predicted  
292 outputs can be applied to HOD. Another approach, type 2 HOD, which is weighted by spatial  
293 or temporal distances, can theoretically consider missing values. However, further testing is  
294 required to determine how many missing values are allowed for a sufficiently accurate  
295 evaluation and what the most appropriate spatial or temporal weighting process is for each  
296 target system.

297 In the HOD approaches proposed here, we cannot distinguish between parts of continuous  
298 patterns and truly disjunctive patterns in dissimilarities; for example, either simple distance-  
299 decay patterns or patterns due to isolation by geographic barriers. Therefore, where the  
300 commonality of spatial disconnections is the main concern, combining HOD approaches with  
301 existing approaches would be more effective in the identification of disjunct barriers (e.g.,  
302 Soltis et al. 2006). In temporal structures, approaches separating trend components have been  
303 used (Cowpertwait and Metcalife 2009), and potentially combined with such methods, it may  
304 be possible to evaluate continuous and disjunctive dissimilarities separately.

305 In existing studies on dissimilarity, unique conceptual and analytical frameworks have  
306 been developed for dissimilarity datasets because of the non-independence problem between  
307 dissimilarity values which share an original value (Anderson et al. 2011). To overcome the  
308 problem of non-independence among values, statistical methods that deal with dissimilarity  
309 matrices, such as the Mantel test (Mantel 1967) and certain developed methods (Lichstein

310 2007, Ferrier et al. 2007, Legendre and Legendre 2012, Anderson and Walsh 2013), have  
311 been used to calculate p-values by permutation procedures. Permutation-based hypothesis  
312 testing approaches adjusted to the HOD framework need to be developed to test the statistical  
313 significance of the similarity or dissimilarity between two dissimilarity matrices, which is a  
314 critical issue for future research on HOD.

315 Although we mainly focused on the second-order dissimilarities in the present study, the  
316 applicability of third- and higher-order dissimilarities would increase in situations where the  
317 amount and dimension of biodiversity information continues to grow. To illustrate the benefit  
318 of HOD, we showed temporal changes of genetic structure (Fig. 3). The figure shows a  
319 pattern in a single species, and thus, second-order dissimilarity (i.e. space×time). If this type  
320 of dataset is available for multiple species, the similarity and dissimilarity of temporal  
321 changes in spatial structure in population genetics can be quantitatively evaluated among  
322 species using third-order dissimilarities (i.e. space×time×species). This simple example tells  
323 us that the breadth of areas that the HOD concept can adopt is rapidly expanding, aligning  
324 with the forthcoming explosive increase in available dissimilarity information.

325

## 326 ***Conclusions***

327 The rapid increase in the availability of spatial and temporal biodiversity information  
328 necessitates comparative studies on spatio-temporal structures of biodiversity compositional  
329 patterns require further development of the dissimilarity concept over conventional ones to  
330 consider higher dimensions of dissimilarity: dissimilarity of dissimilarity structures. Our  
331 study introduced the concept of higher-order dissimilarity (HOD), which can account for  
332 dissimilarities of spatial or temporal dissimilarity structures. For example, this framework can  
333 be applied to various types of broad-scale biodiversity monitoring datasets and enables the  
334 evaluation of temporal changes in the spatial HOD to a baseline. Furthermore, the concept is  
335 applicable even if the compared datasets have completely different origins (e.g. different  
336 taxonomic groups and hierarchies of biological organisation, Fig. 1b), as long as they are  
337 summarised into dissimilarity information at their own level. We mainly focused on the  
338 biodiversity dataset in the present study; the concept of HOD is applicable to all kinds of

339 dissimilarity matrices, not just those based on biodiversity. For example, various  
340 contemporary issues arise in the social ecological system, and this HOD will be useful in  
341 examining the relationships between different layers, such as the economy, culture, and  
342 biodiversity. Therefore, the HOD concept and related approaches pave the way for novel  
343 dimensional approaches that deal with large amounts of dissimilarity information.

344

#### 345 **Data accessibility statement**

346 Simulated data and codes will be uploaded after acceptance of the manuscript to figshare.

347

#### 348 **References**

349 Anderson, M.J., Crist, T.O., Chase, J.M., Vellend, M., Inouye, B.D., Freestone, A.L. et al.

350 (2011) Navigating the multiple meanings of  $\beta$  diversity: a roadmap for the practicing  
351 ecologist. *Ecology Letters*, 14, 19–28.

352 Anderson, M.J., & Walsh, D.C. (2013) PERMANOVA, ANOSIM, and the Mantel test in the  
353 face of heterogeneous dispersions: what null hypothesis are you testing? *Ecological*  
354 *Monographs*, 83, 557–574.

355 Baselga, A. (2010) Partitioning the turnover and nestedness components of beta diversity.  
356 *Global Ecology and Biogeography*, 19, 134–143.

357 Cowpertwait, P.S., & Metcalfe, A.V. (2009) *Introductory time series with R*. Springer  
358 Science & Business Media.

359 Gotelli, N.J., Moyes, F., Antão, L.H., Blowes, S.A., Dornelas, M., McGill, B.J. et al. (2022)  
360 Long-term changes in temperate marine fish assemblages are driven by a small subset  
361 of species. *Global Change Biology*, 28, 46–53.

362 Eckardt, M., & Mateu, J. (2021) Partial and semi-partial statistics of spatial associations for  
363 multivariate areal data. *Geographical. Analysis*, 53, 818–835.

364 Ferrier, S., Manion, G., Elith, J., & Richardson, K. (2007) Using generalized dissimilarity  
365 modelling to analyse and predict patterns of beta diversity in regional biodiversity  
366 assessment. *Diversity and Distributions*, 13, 252–264.

- 367 HilleRisLambers, J., Adler, P.B., Harpole, W.S., Levine, J.M., & Mayfield, M.M. (2012)  
368 Rethinking community assembly through the lens of coexistence theory. *Annual Review*  
369 *of Ecology, Evolution and Systematics*, 43, 2012.
- 370 Hoban, S., Campbell, C.D., da Silva, J. M., Ekblom, R., Funk, W.C., Garner, B.A., et al.  
371 (2021) Genetic diversity is considered important but interpreted narrowly in country  
372 reports to the Convention on Biological Diversity: Current actions and indicators are  
373 insufficient. *Biological Conservation*, 261, 109233.
- 374 Holt, B.G., Lessard, J.P., Borregaard, M.K., Fritz, S.A., Araújo, M.B., Dimitrov, D. (2013)  
375 An update of Wallace's zoogeographic regions of the world. *Science*, 339, 74-78.
- 376 Koleff, P., Gaston, K.J., & Lennon, J.J. (2003) Measuring beta diversity for presence-  
377 absence data. *Journal of Animal Ecology*, 72, 367-382.
- 378 Komaki, S. (2021) Widespread misperception about a major East Asian biogeographic  
379 boundary exposed through bibliographic survey and biogeographic meta-analysis.  
380 *Journal of Biogeography* 48, 2375-2386.
- 381 Lee, S. I. (2001) Developing a bivariate spatial association measure: an integration of  
382 Pearson's  $r$  and Moran's  $I$ . *Journal of Geographical Systems*, 3, 369-385.
- 383 Legendre, P. (2019) A temporal beta-diversity index to identify sites that have changed in  
384 exceptional ways in space-time surveys. *Ecology and Evolution*, 9, 3500-3514
- 385 Legendre, P. & Legendre, L. (2012) Numerical ecology, 3rd edn. *Elsevier*. Amsterdam
- 386 Lichstein, J. W. (2007) Multiple regression on distance matrices: a multivariate spatial  
387 analysis tool. *Plant Ecology* 188, 117-131.
- 388 Lozupone, C., & Knight, R. (2005) UniFrac: a new phylogenetic method for comparing  
389 microbial communities. *Applied and Environmental Microbiology*, 71, 8228-8235.
- 390 Mantel, N. (1967) The detection of disease clustering and a generalized regression approach.  
391 *Cancer Res.* 27(2\_Part\_1), 209-220.
- 392 May, F., Gerstner, K., McGlenn, D.J., Xiao, X., & Chase, J.M. (2018) mobsim: An R package  
393 for the simulation and measurement of biodiversity across spatial scales. *Methods in*  
394 *Ecology and Evolution*, 9, 1401-1408.

- 395 Magurran, A.E., Dornelas, M., Moyes, F., & Henderson, P.A. (2019) Temporal  $\beta$  diversity—  
396 A macroecological perspective. *Global Ecology and Biogeography*, 28, 1949-1960.
- 397 Mammola, S., & Cardoso, P. (2020) Functional diversity metrics using kernel density  
398  $n$ -dimensional hypervolumes. *Methods in Ecology and Evolution*, 11, 986–995.
- 399 Miki, T., Yokokawa, T., Ke, P. J., Hsieh, I., Hsieh, C. H., Kume, T. et al. (2018) Statistical  
400 recipe for quantifying microbial functional diversity from EcoPlate metabolic profiling.  
401 *Ecological Research*, 33, 249-260.
- 402 Mori, A. S., Isbell, F., Fujii, S., Makoto, K., Matsuoka, S., & Osono, T. (2016) Low  
403 multifunctional redundancy of soil fungal diversity at multiple scales. *Ecology Letters*,  
404 19, 249-259.
- 405 Nakadai, R. (2020) Degrees of compositional shift in tree communities vary along a gradient  
406 of temperature change rates over one decade: Application of an individual-based  
407 temporal beta-diversity concept. *Ecology and Evolution* 10, 13613-13623.
- 408 Nakadai, R. (2022) Development of novel temporal beta-diversity indices for assessing  
409 community compositional shifts accounting for changes in the properties of individuals.  
410 *Ecological Indicators*, 144, 109427.
- 411 O'Brien, D., Laikre, L., Hoban, S., Bruford, M.W., Ekblom, R., Fischer, M.C. et al. (2022)  
412 Bringing together approaches to reporting on within species genetic diversity. *Journal of*  
413 *Applied Ecology*, 59, 2227–2233.
- 414 Odum, E.P. (1950) Bird populations of the Highlands (North Carolina) Plateau in relation to  
415 plant succession and avian invasion. *Ecology* 31, 587–605.
- 416 Olden, J.D. (2006). Biotic homogenization: a new research agenda for conservation  
417 biogeography. *Journal of Biogeography*. 33, 2027-2039.
- 418 Poisot, T., Canard, E., Mouillot, D., Mouquet, N., & Gravel, D. (2012) The dissimilarity of  
419 species interaction networks. *Ecology Letters*, 15, 1353-1361.
- 420 Raymond, M., & Rousset, F. (1995). An exact test for population differentiation. *Evolution*  
421 49, 1280-1283.



- 422 Rocchini, D., Luque, S., Pettorelli, N., Bastin, L., Doktor, D., Faedi, N. et al. (2018)  
423 Measuring  $\beta$  diversity by remote sensing: A challenge for biodiversity monitoring.  
424 *Methods in Ecology and Evolution*, 9, 1787-1798.
- 425 Smith, J.E., Hunter, C.L., & Smith, C. M. (2010) The effects of top-down versus bottom-up  
426 control on benthic coral reef community structure. *Oecologia*, 163, 497-507.
- 427 Soltis, D.E., Morris, A.B., McLachlan, J.S., Manos, P.S., & Soltis, P.S. (2006) Comparative  
428 phylogeography of unglaciated eastern North America. *Molecular Ecology*, 15, 4261–  
429 4293.
- 430 Tsuji, S., Shibata, N., Sawada, H., & Watanabe, K. (2022) Differences in the genetic  
431 structure between and within two landlocked Ayu groups with different migration  
432 patterns in Lake Biwa revealed by environmental DNA analysis. *Environmental DNA*,  
433 <https://doi.org/10.1002/edn3.345>
- 434 Valtonen, A., Hirka, A., Szöcs, L., Ayres, M. P., Roininen, H., & Csóka, G. (2017).  
435 Long-term species loss and homogenization of moth communities in Central Europe.  
436 *Journal of Animal Ecology*, 86, 730–738.
- 437 Wartenberg, D. (1985) Multivariate spatial correlation: a method for exploratory  
438 geographical analysis. *Geographical Analysis*, 17, 263-283.
- 439 Wallace, A.R. (1894) What are zoological regions? *Nature*, 49, 610–613.
- 440 Whittaker R.H. (1960) Vegetation of the Siskiyou mountains, Oregon and California.  
441 *Ecological Monographs* 30, 279–338
- 442 Whittaker R.H. (1972) Evolution and measurement of species diversity. *Taxon*, 21, 213–251
- 443 Whittaker, R.J., Riddle, B.R., Hawkins, B.A., & Ladle, R.J. (2013) The geographical  
444 distribution of life and the problem of regionalization: 100 years after Alfred Russel  
445 Wallace. *Journal of Biogeography*, 40, 2209-2214.
- 446 Wright, S. (1969) Genetics and the Evolution of Populations. Vol. 2: The Theory of Gene  
447 Frequencies.  
448

449 **Figure legends**

450 **Figure 1** Schematic of higher-order dissimilarity (HOD). A spatial case of HOD is shown in  
451 (a). Potential analytical framework for HOD based on spatial and temporal comparisons (i.e.,  
452 spatial and temporal HOD) are shown in (b). For visualization, only three compositional  
453 types are hypothesized, which correspond to three level of darkness in each colour (e.g., blue,  
454 green, and red). Specifically, we hypothesized that dissimilarities between sites (or time  
455 points) of same level of darkness were zero (i.e., identical composition), those between sites  
456 of one darker or lighter difference were 0.5, and those between the darkest and lightest sites  
457 were 1.0. The grey arrows indicate conventional dissimilarity (i.e., first-order dissimilarity)  
458 and the black arrows indicate HOD. Black star and white star among compared datasets  
459 indicate identical sites or time points, respectively.

460

461 **Figure 2** Schematic of specific analytical procedures for two types of higher-order  
462 dissimilarity (HOD), specifically one without spatial information and the other with the  
463 information. For visualization, only three compositional types are hypothesized, which  
464 correspond to three level of darkness in each colour (e.g., blue, green, and red). Specifically,  
465 we hypothesized that dissimilarities between sites (or time points) of same level of darkness  
466 were zero (i.e., identical composition), those between sites of one darker or lighter difference  
467 were 0.5, and those between darkest and lightest sites were 1.0. The asterisk with 1(\*1)  
468 showed the specific calculation of distance between pair of sites.

469

470 **Figure 3** Sample application of higher-order dissimilarity (HOD) to genetic monitoring using  
471 two simulated datasets based on two types of scenarios from time 0 to time 100. In both  
472 scenarios, the stable conditions are hypothesized by time 30 (shared section in light green).  
473 After time 30, genetic structure is stable in one scenario (upper section in orange) but  
474 homogenized in the other (lower section in blue). The change of calculated type 1 of HOD  
475 index (i.e., mean absolute differences) compared to the value at time 0 is shown in (a). The  
476 genetic structure is visualized in (b), and the colours were determined using the two axes of  
477 NMDS (details see Supplementary text 2).

478 **Figure 1**

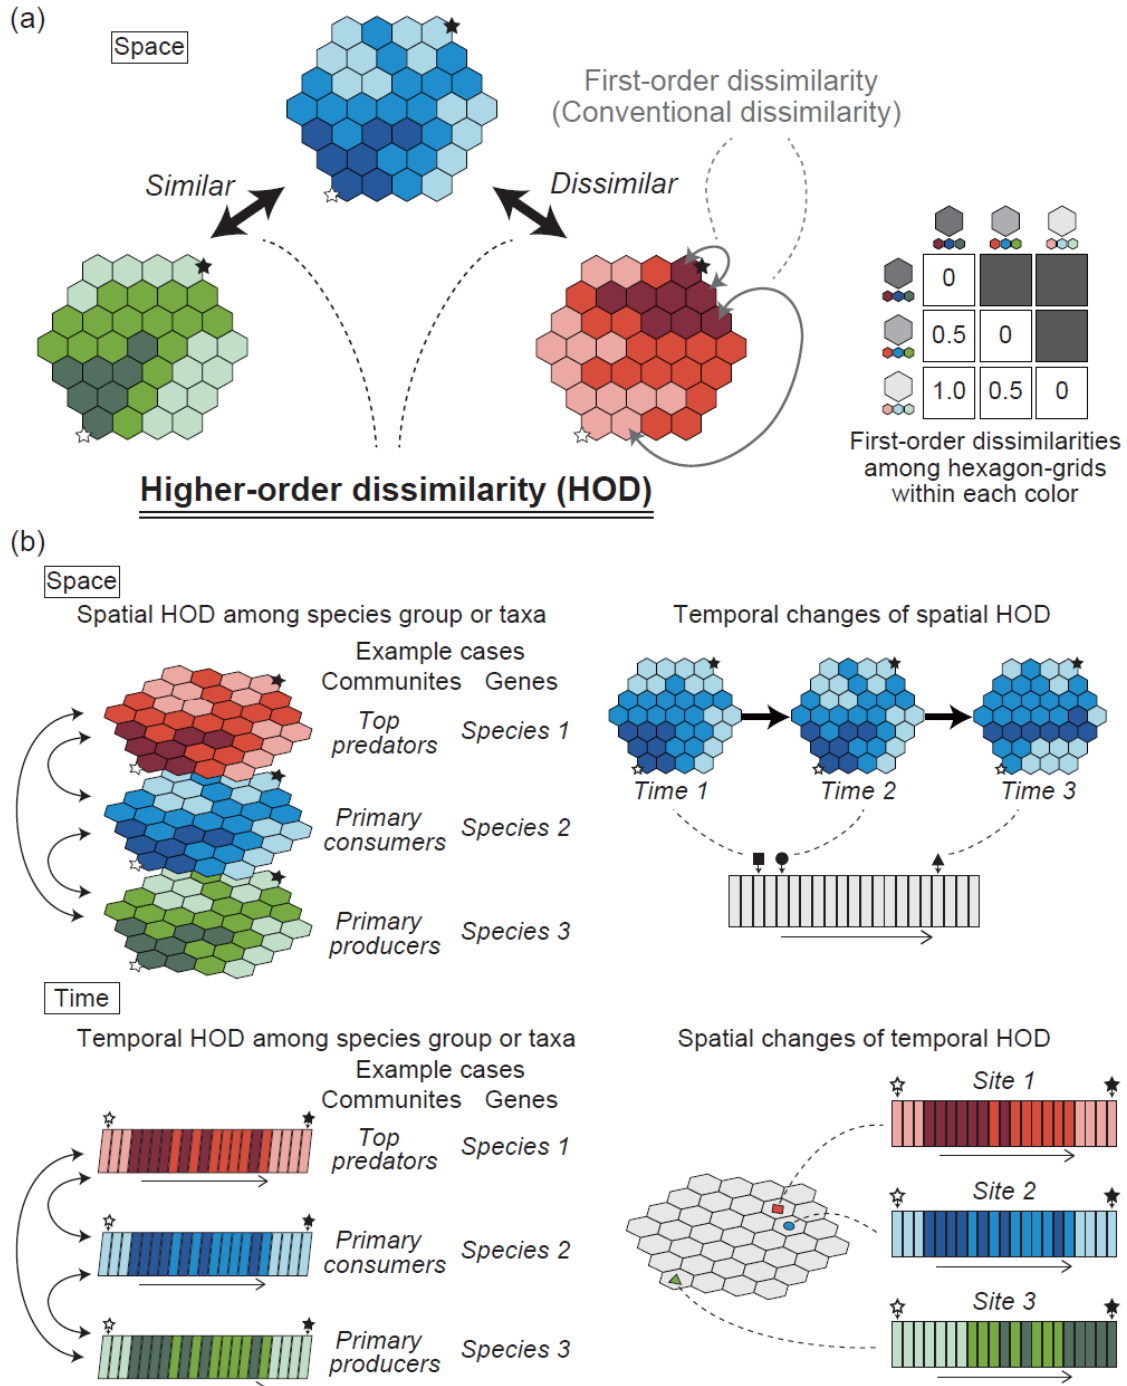

479

480

481 **Figure 2**

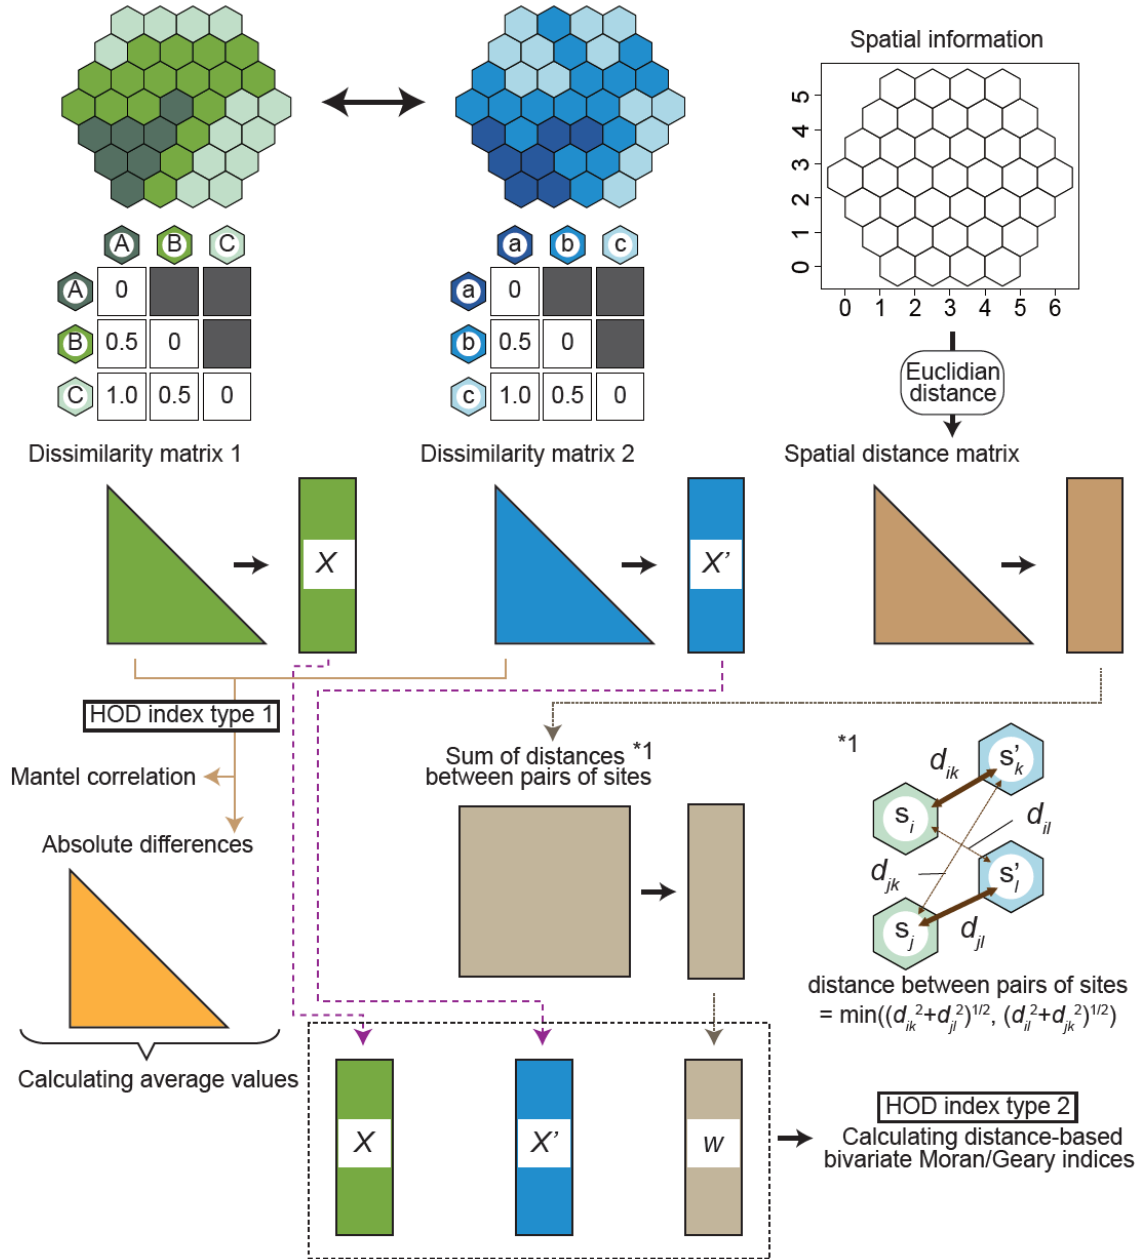

482

483

484 **Figure 3**

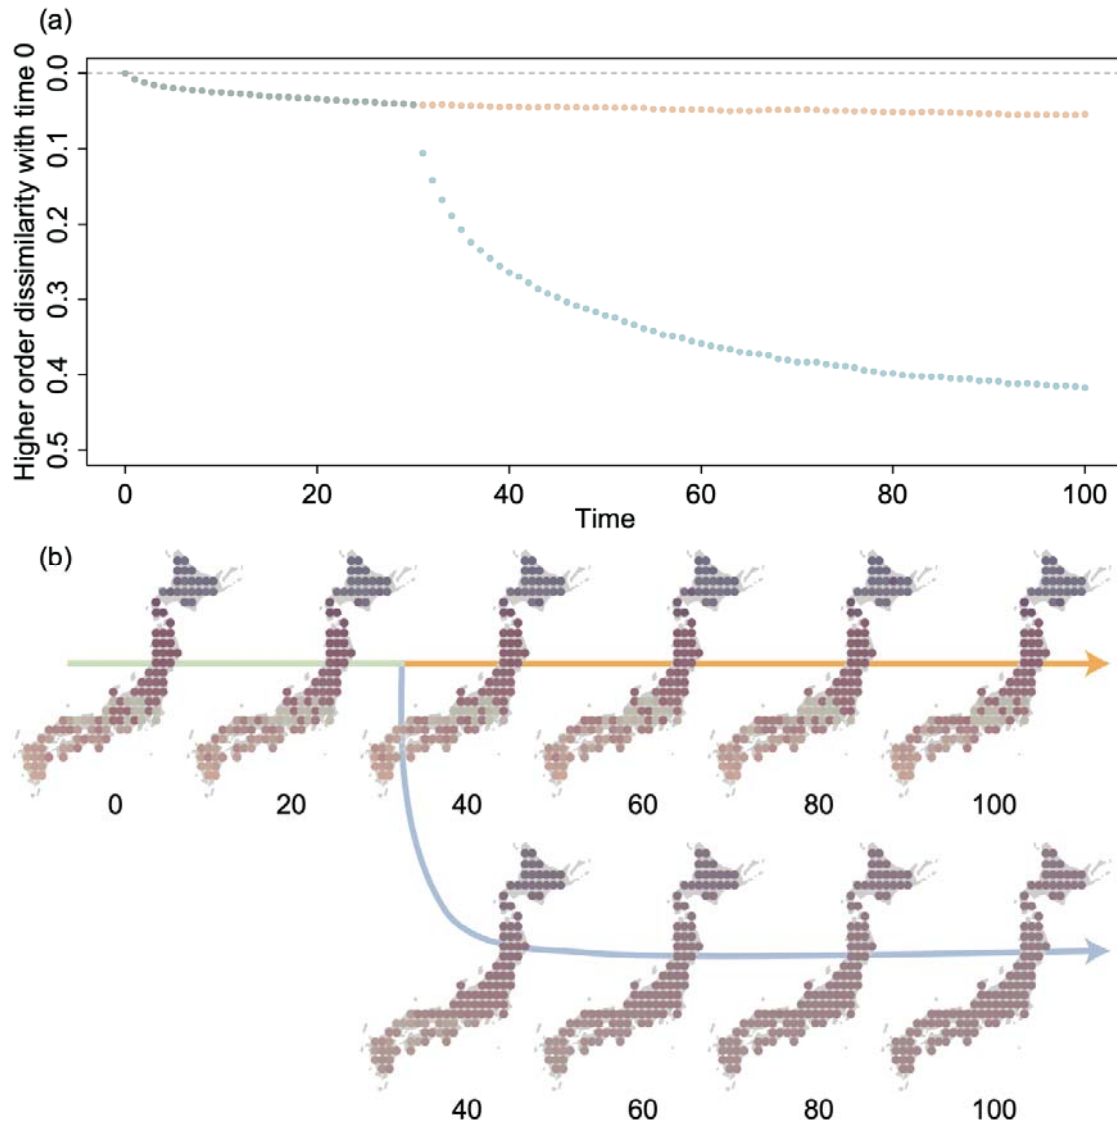

485

486

.87 **Table 1** Simple sample cases to show properties of HOD indices. Patterns X and Y represent pairs for calculating HODs. Mantel  $r$  (X) and (Y) indicate the  
 .88 spatial autocorrelation, thus correlation between spatial distances and dissimilarity values for each pattern X and Y. Four HOD indices are shown, which are  
 .89 mean absolute differences and mantel  $r$  (with  $P$ -value) as type 1 and bivariate Moran's  $I$  and Geary's  $C$  as type 2. For visualization purpose, only three  
 .90 compositional types are hypothesized, which correspond to three level of darkness in each colour (e.g., blue, green, and red). Specifically, we hypothesized  
 .91 that dissimilarities between sites (or time points) of the same level of darkness were zero (i.e., identical composition), those between sites of one darker or  
 .92 lighter difference were 0.5, and those between the darkest and lightest sites were 1.0.

| Association | Pattern                                                                             |                                                                                     | Mantel (Space) |            |         |            | HOD type 1                |            |            | HOD type 2          |                     |
|-------------|-------------------------------------------------------------------------------------|-------------------------------------------------------------------------------------|----------------|------------|---------|------------|---------------------------|------------|------------|---------------------|---------------------|
|             | X                                                                                   | Y                                                                                   | $r$ (X)        | $P$ -value | $r$ (Y) | $P$ -value | Absolute mean differences | Mantel $r$ | $P$ -value | Bivariate Moran $I$ | Bivariate Geary $C$ |
| A-A         |    |    | 0.0367         | 0.0013     | 0.0367  | 0.0013     | 0.0000                    | 1.0000     | 0.0000     | 0.6539              | 0.3405              |
| B-B         |    |    | 0.0263         | 0.0162     | 0.0263  | 0.0162     | 0.0000                    | 1.0000     | 0.0000     | 0.4783              | 0.5107              |
| C-C         |   |   | -0.0173        | 0.1089     | -0.0173 | 0.1089     | 0.0000                    | 1.0000     | 0.0000     | 0.1594              | 0.8622              |
| A-B         |  |  | 0.0367         | 0.0013     | 0.0263  | 0.0162     | 0.3108                    | 0.1759     | 0.0036     | 0.1322              | 0.8594              |
| B-C         |  |  | 0.0263         | 0.0162     | -0.0173 | 0.1089     | 0.3649                    | -0.0886    | 0.0796     | -0.0421             | 1.0473              |
| C-A         |  |  | -0.0173        | 0.1089     | 0.0367  | 0.0013     | 0.3423                    | 0.0301     | 0.5580     | 0.0120              | 0.9959              |

|      |                                                                                   |                                                                                   |         |        |         |        |        |        |        |         |        |
|------|-----------------------------------------------------------------------------------|-----------------------------------------------------------------------------------|---------|--------|---------|--------|--------|--------|--------|---------|--------|
| A-A' |  |  | 0.0367  | 0.0013 | 0.0367  | 0.0013 | 0.3183 | 0.1318 | 0.0183 | 0.1345  | 0.8599 |
| B-B' |  |  | 0.0263  | 0.0162 | 0.0263  | 0.0162 | 0.3453 | 0.0097 | 0.8685 | -0.0075 | 0.9964 |
| C-C' |  |  | -0.0173 | 0.1089 | -0.0173 | 0.1089 | 0.3348 | 0.0405 | 0.3932 | 0.0131  | 1.0097 |
| A-C' |  |  | 0.0367  | 0.0013 | -0.0173 | 0.1089 | 0.3288 | 0.0910 | 0.0809 | 0.0547  | 0.9548 |

.94 **Table 2** Potential applications of higher-order dissimilarity (HOD) approach

| Target axis of HOD        | Targets of comparison | Question                                                                                                                                         |
|---------------------------|-----------------------|--------------------------------------------------------------------------------------------------------------------------------------------------|
| (a) community composition |                       |                                                                                                                                                  |
| Time                      | Space                 | How do temporal changes of community composition vary in space?<br>Do closer sites show more similar community compositional change across time? |
| Time                      | Taxa                  | Which taxa share similar changes of community composition in time?                                                                               |
| Space                     | Time                  | How does spatial composition change over time?<br>When did large change of community compositional structure happen?                             |
| Space                     | Taxa                  | Which taxa share similar community composition structure in space?                                                                               |
| (b) population genetics   |                       |                                                                                                                                                  |
| Time                      | Space                 | How does temporal genetic frequency change in space?<br>Do closer sites show more similar changes in genetic frequency across time?              |
| Time                      | Taxa                  | Which taxa share similar changes of genetic frequency over time?                                                                                 |
| Space                     | Time                  | How does the spatial genetic structure change over time?<br>When did a large change in genetic structure occur?                                  |
| Space                     | Taxa                  | Which taxa share similar changes of genetic frequency in space?                                                                                  |
| (c) ecosystem function    |                       |                                                                                                                                                  |
| Time                      | Space                 | How does temporal ecosystem function change in space?<br>Do closer sites show more similar change of ecosystem function across time?             |
| Space                     | Time                  | How does spatial genetic structure change over time?<br>When did a large change in the genetic structure occur?                                  |
| (d) interaction network   |                       |                                                                                                                                                  |
| Time                      | Space                 | How does the temporal network structure change in space?<br>Do closer sites show more similar changes in network structure across time?          |



How does spatial network structure change in time?  
When did large change of network structure happened?

Which traits share similar evolutionary changes across macroevolutionary history?

---

Space

Time

(e) macroevolution

Phylogeny

Trait

.95

.96

497 **Appendices**

498 **Figure S1** Mantel correlations among absolute mean differences and mantel  $r$  as type 1 and  
499 bivariate Moran's  $I$  and Geary's  $C$  as type 2 (9,999 times permutation)

500 **Figure S2** Hexagon grids used in simulation

501

502 **Supplementary text 1** Detailed information on the simulation of community datasets and  
503 calculation of dissimilarity matrices to test the properties of HOD indices.

504 **Supplementary text 2** Detailed information on simulated genetic structure across four major  
505 islands in Japan
